# Supplementary material
Source: Royal Society of Chemistry journal article supplement (doi:10.1039/d6tb00620e)
Supplement: d6tb00620e1.pdf [file d6tb00620e1.pdf]

## Supporting information

Xuan Sun <sup>a,b,c,d</sup>, Jiangnan Yu <sup>a,b,c,d</sup>, Wenwen Deng <sup>\*,a,b,c,d</sup>, Ximing Xu <sup>\*,a,b,c,d</sup>

<sup>a</sup> School of Pharmacy, Jiangsu University, Zhenjiang 212001, China

<sup>b</sup> The International Institute on Natural Products and Stem Cells (iNPS), Zhenjiang 212001, China

<sup>c</sup> Key lab for Drug Delivery & Tissue Regeneration, Zhenjiang 212001, China

<sup>d</sup> Jiangsu Provincial Research Center for Medicinal Function Development of New Food Resources, Zhenjiang 212001, China

\*Corresponding Author: Ximing Xu, Email: [xmxu@ujs.edu.cn](mailto:xmxu@ujs.edu.cn); Wenwen Deng, Email: [deng4956@yeah.net](mailto:deng4956@yeah.net)

**Table S1 ANOVA of particle size**

| Source                | SS      | df | MS      | F    | Sig. |
|-----------------------|---------|----|---------|------|------|
| A: PLGA               | 21708.7 | 2  | 10854.4 | 64.1 | **   |
| B: Drug-to-PLGA ratio | 2738.7  | 2  | 1369.3  | 8.1  | *    |
| C: PVA                | 302.0   | 2  | 151.0   | 0.89 |      |
| Error (D)             | 338.7   | 2  | 169.3   |      |      |
| Total                 | 25088.1 | 8  |         |      |      |

\*Note: \*  $p < 0.05$ , \*\*  $p < 0.01$ .

**Table S2 ANOVA of encapsulation efficiency**

| Source                | SS    | df | MS    | F    | Sig. |
|-----------------------|-------|----|-------|------|------|
| A: PLGA               | 313.2 | 2  | 156.6 | 68.4 | **   |
| B: Drug-to-PLGA ratio | 5.5   | 2  | 2.8   | 1.2  |      |
| C: PVA                | 425.8 | 2  | 212.9 | 93.0 | **   |
| Error (D)             | 4.6   | 2  | 2.3   |      |      |
| Total                 | 749.1 | 8  |       |      |      |

\*Note: \*  $p < 0.05$ , \*\*  $p < 0.01$ .
